# Supplementary material for: Trace Metal Partitioning in the Salinity Gradient of the Highly Stratified Estuary: A Case Study in the Krka River Estuary (Croatia)
Source: MDPI journal article supplement (doi:10.3390/app12125816), 2022-06-08
Supplement: s1 [file s1]

## Supplementary Materials for the manuscript

### Trace metal partitioning in the salinity gradient of the highly stratified estuary: A case study in the Krka River estuary (Croatia)

Saša Marcinek<sup>1,\*</sup>, Ana Marija Cindrić<sup>1</sup>, Jasmin Pađan<sup>1</sup> and Dario Omanović<sup>1,\*</sup>

<sup>1</sup>Ruđer Bošković Institute, Center for Marine and Environmental Research, 10000 Zagreb, Croatia

\*Correspondence: smarcin@irb.hr and omanovic@irb.hr

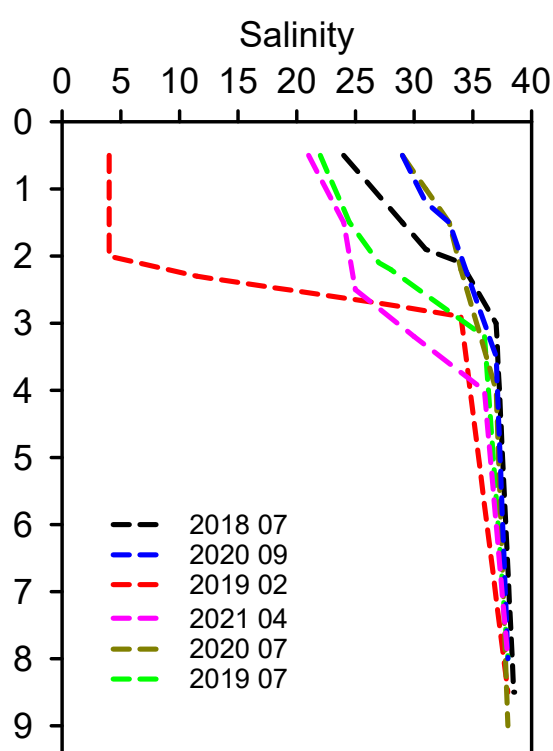

**Figure S1.** Vertical salinity profiles during the time of the samplings as indicated in the legend.

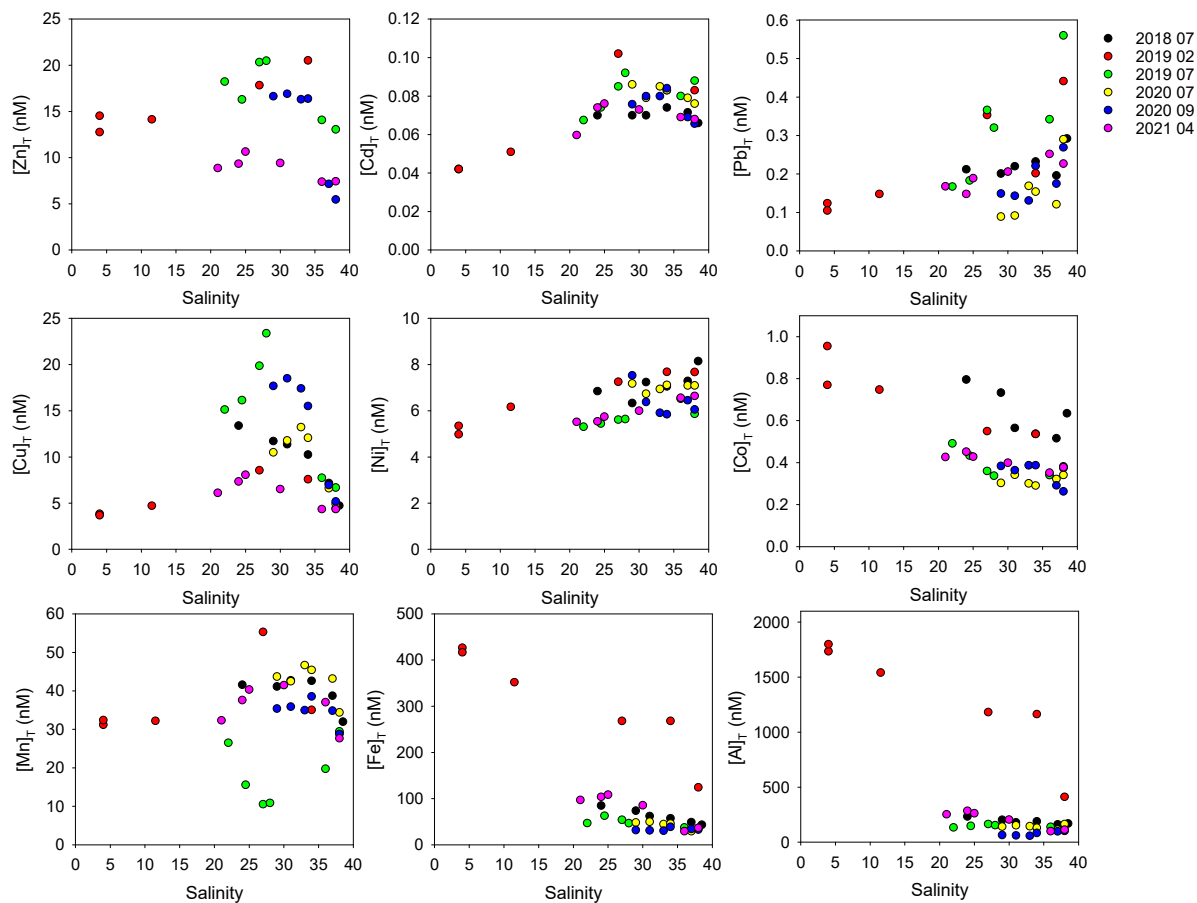

**Figure S2.** Concentrations of studied trace metals in the total fraction (unfiltered sample) in relation to salinity.

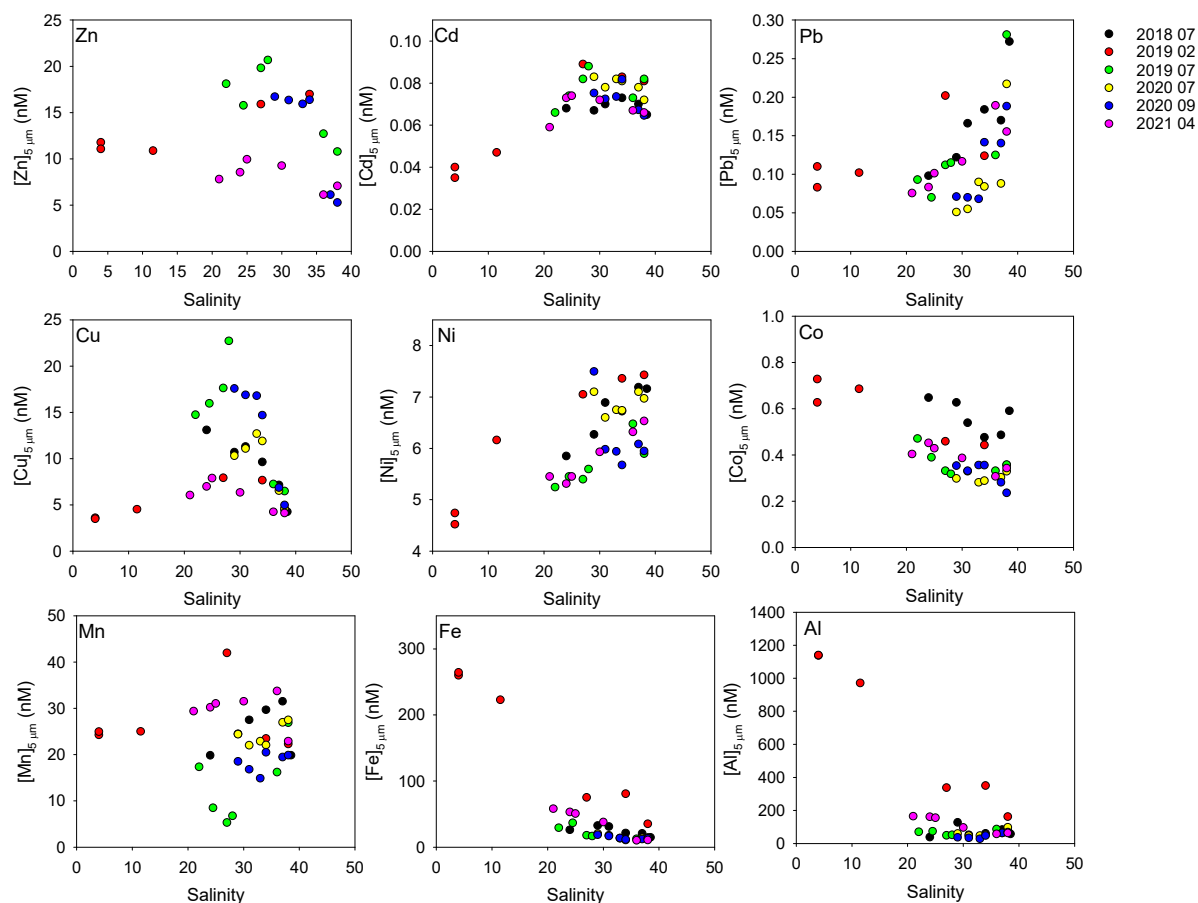

**Figure S3.** Concentrations of studied trace metals in < 5  $\mu\text{m}$  fraction in relation to salinity.

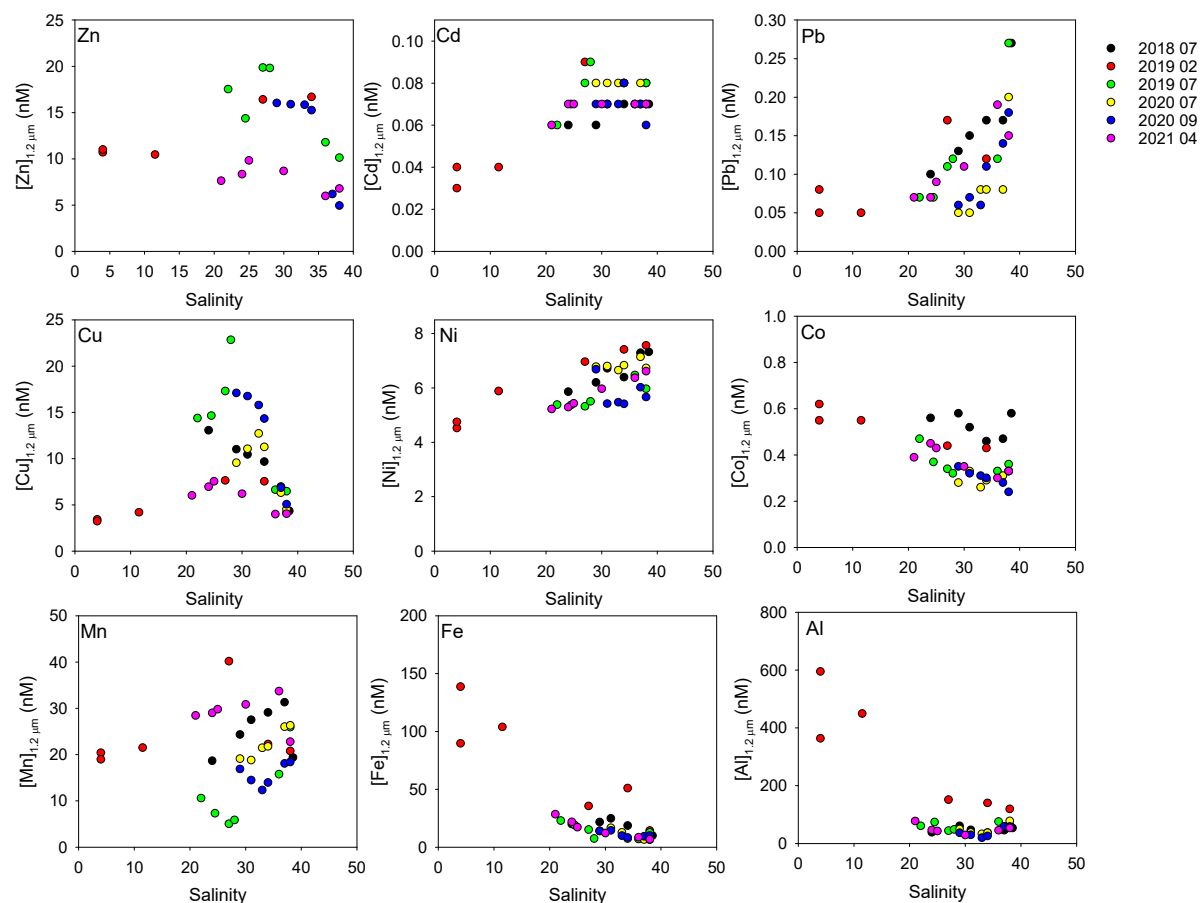

**Figure S4.** Concentrations of studied trace metals in < 1.2  $\mu\text{m}$  fraction in relation to salinity.

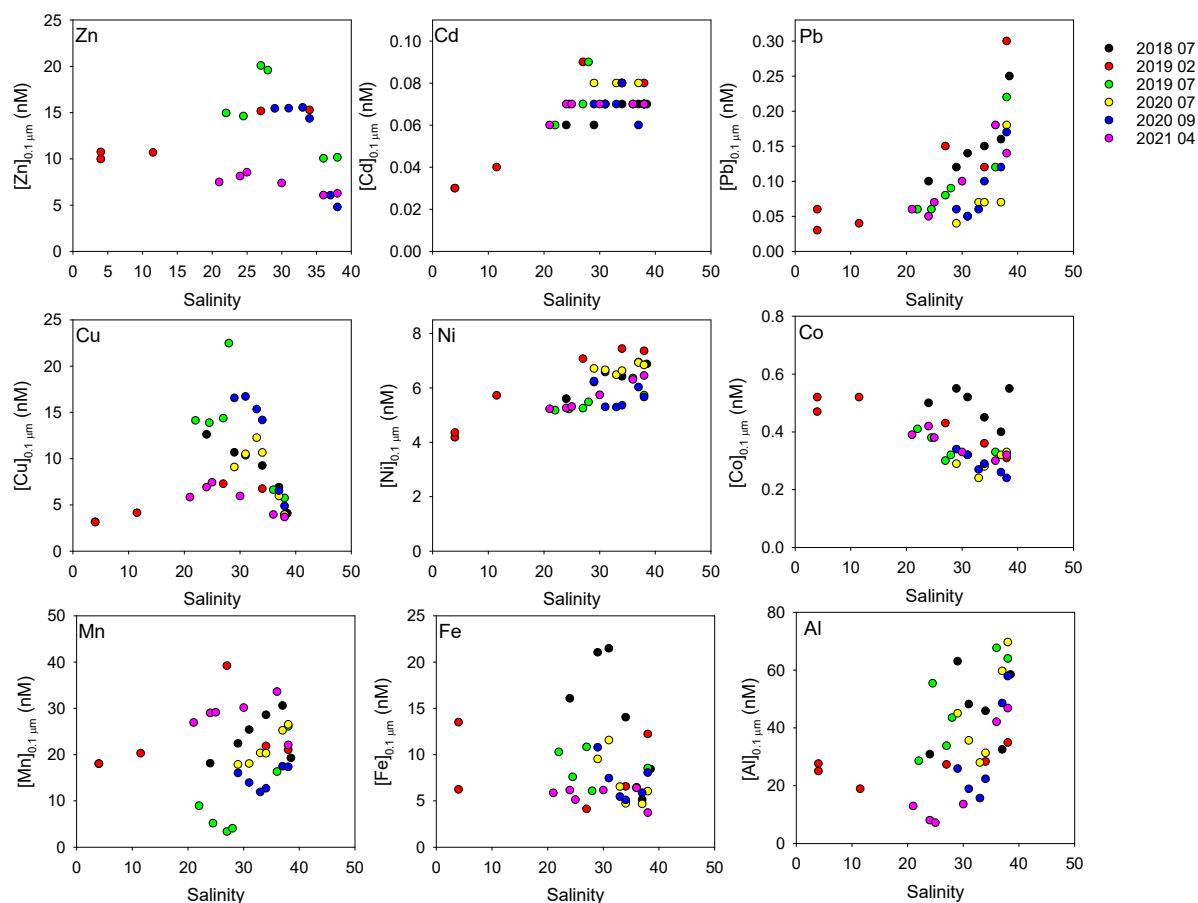

**Figure S5.** Concentrations of studied trace metals in  $< 0.1 \mu\text{m}$  fraction in relation to salinity.

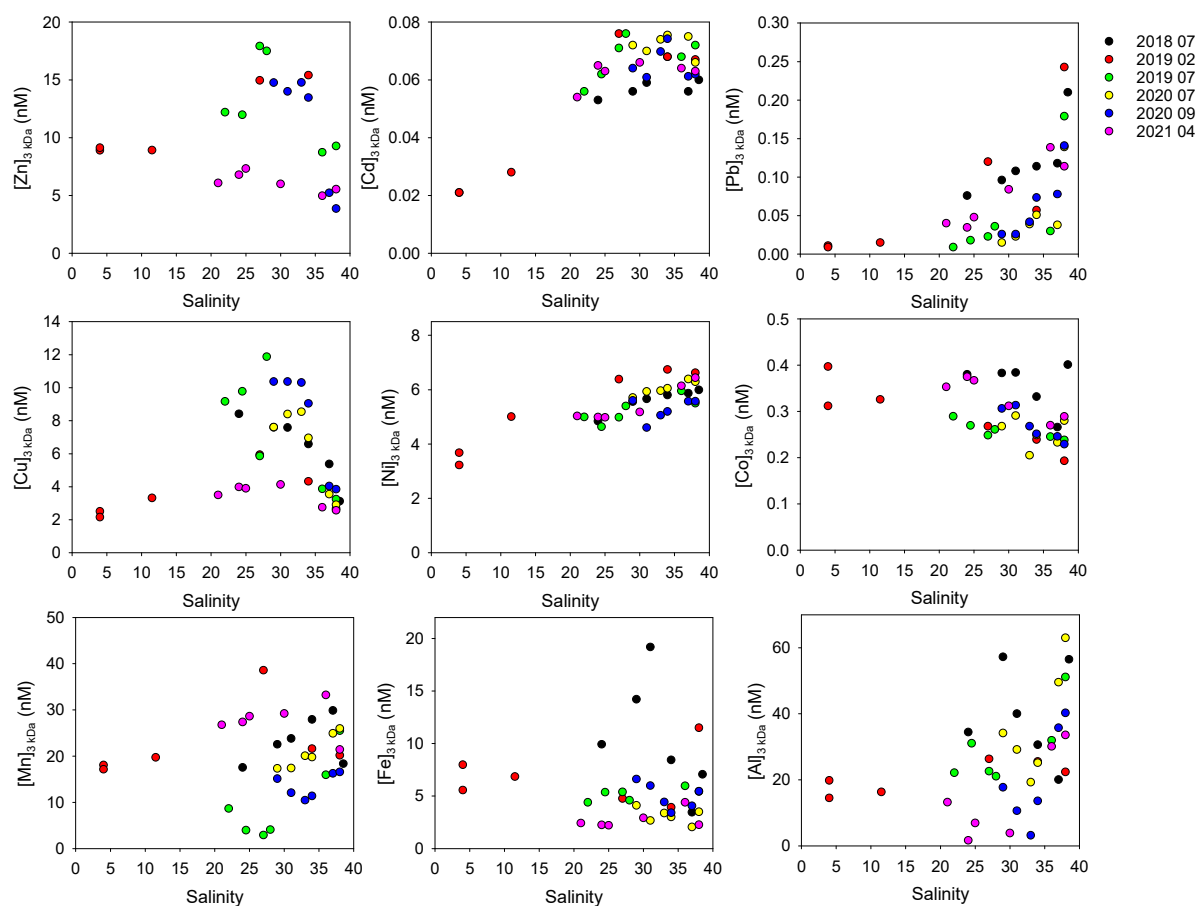

**Figure S6.** Concentrations of studied trace metals in truly dissolved fraction (< 3 kDa) in relation to salinity.

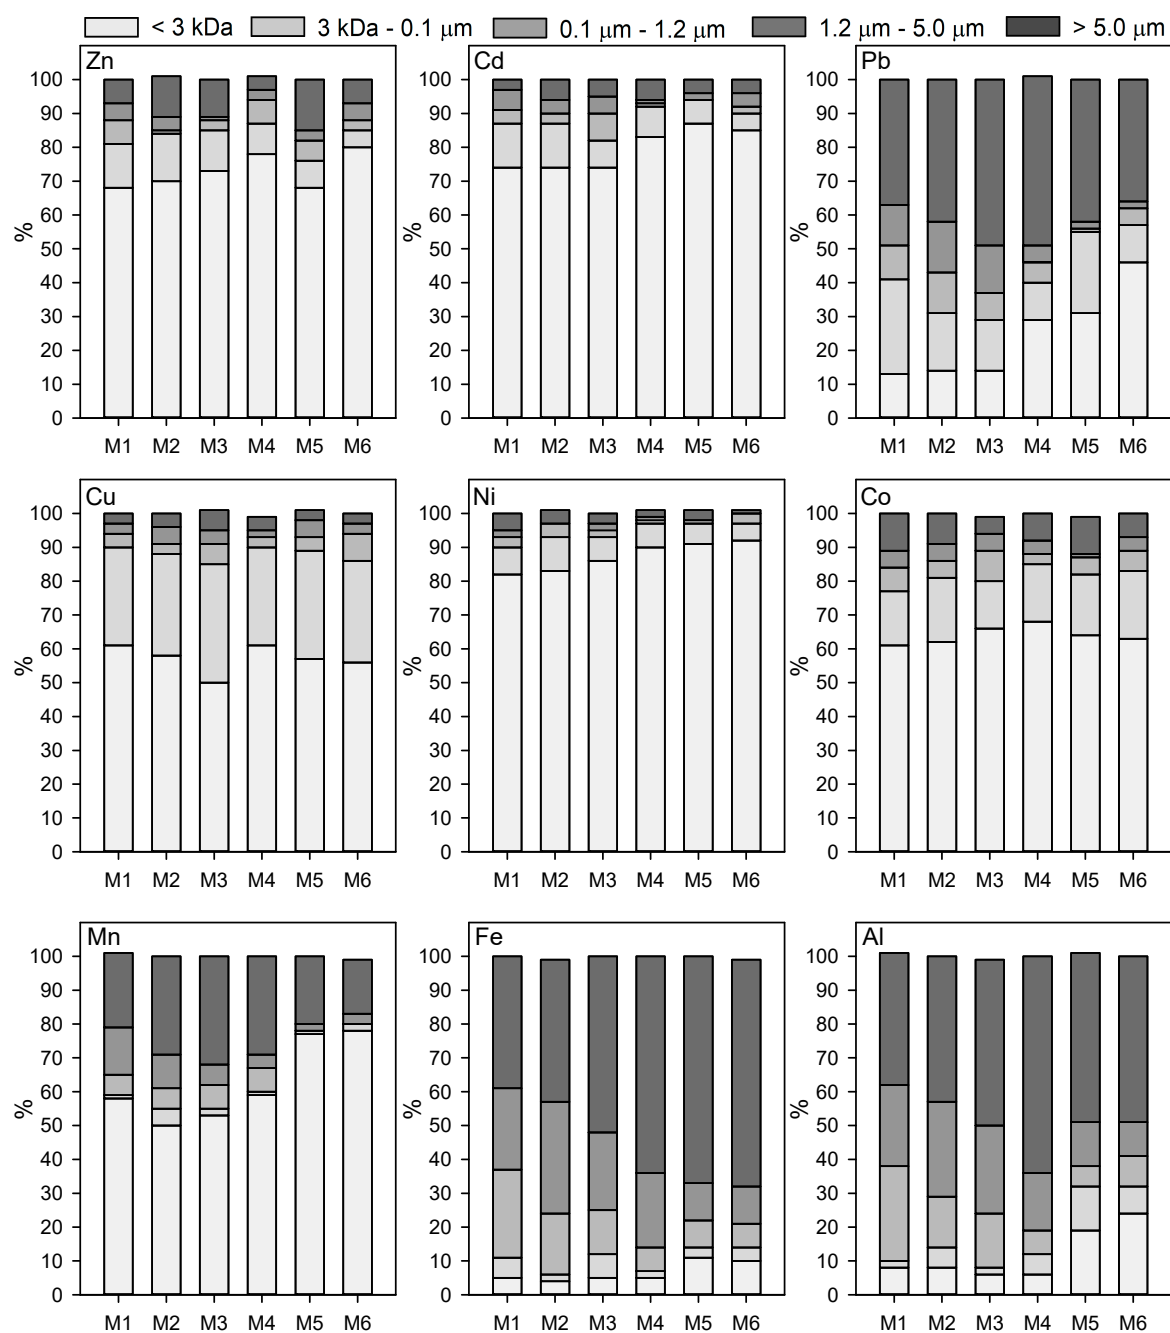

**Figure S7.** Average percentages of studied trace metals (samplings with FWL characterised by salinity < 25) in each size fraction (as indicated in the figure) at each depth (M1 – M6).

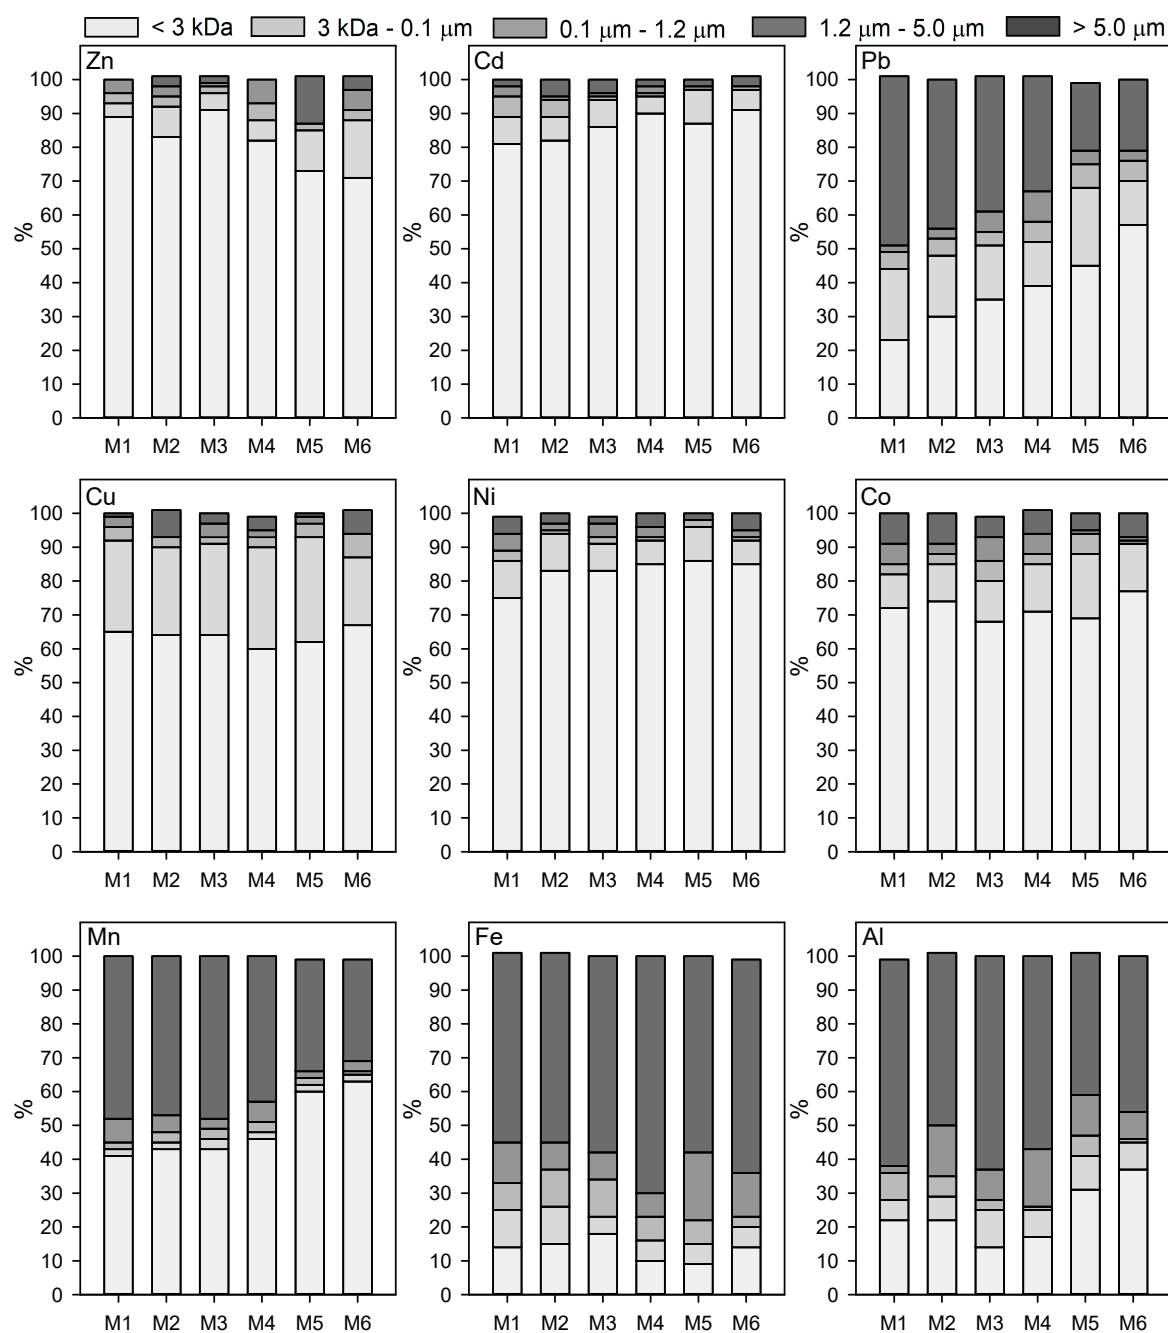

**Figure S8.** Average percentages of studied trace metals (samplings with FWL characterised by salinity > 25) in each size fraction (as indicated in the figure) at each depth (M1 – M6).



**Table S1.** Percentage of colloidal metal fraction in the dissolved phase - comparison between various coastal areas.

| Trace metal | Colloidal size                       | Colloid%    | Study area                                             | Reference                      |
|-------------|--------------------------------------|-------------|--------------------------------------------------------|--------------------------------|
| Pb          | <b>3 kDa – 0.1 <math>\mu</math>m</b> | <b>37%</b>  | <b>Krka River estuary</b>                              | <b>This study</b>              |
|             | 1 kDa – 0.2 $\mu$ m                  | Up to 42%   | Guandang River estuary                                 | (Lu et al., 2020)              |
|             | 1 kDa – 0.2 $\mu$ m                  | 31%         | Coast of North Yellow Sea                              | (Lu et al., 2019)              |
|             | 1 kDa – 0.2 $\mu$ m                  | < 14%       | Xin'an River estuary                                   | (Lu et al., 2020)              |
|             | 5 kDa – 0.2 $\mu$ m                  | 94%         | Penzé estuary                                          | (Waeles et al., 2008)          |
| Fe          | <b>3 kDa – 0.1 <math>\mu</math>m</b> | <b>37%</b>  | <b>Krka River estuary</b>                              | <b>This study</b>              |
|             | 100 kDa – 0.4 $\mu$ m                | 87%         | Venice Lagoon                                          | (Martin et al., 1995)          |
|             | 5 kDa – 0.2 $\mu$ m                  | 7.6%        | Gulf of Trieste                                        | (Klun et al., 2019)            |
|             | 10 kDa – 0.2 $\mu$ m                 | 84%         | San Francisco Bay – low salinity region                | (Sañudo-Wilhelmy et al., 1996) |
|             | 10 kDa – 0.2 $\mu$ m                 | 40%         | San Francisco Bay – high salinity region               | (Sañudo-Wilhelmy et al., 1996) |
| Al          | <b>3 kDa – 0.1 <math>\mu</math>m</b> | <b>31%</b>  | <b>Krka River estuary</b>                              | <b>This study</b>              |
|             | 5 kDa – 0.2 $\mu$ m                  | 1.5%        | Gulf of Trieste                                        | (Klun et al., 2019)            |
|             | 10 kDa – 0.2 $\mu$ m                 | 84%         | San Francisco Bay – low-salinity region                | (Sañudo-Wilhelmy et al., 1996) |
|             | 10 kDa – 0.2 $\mu$ m                 | < 10%       | San Francisco Bay – high-salinity region               | (Sañudo-Wilhelmy et al., 1996) |
| Mn          | <b>3 kDa – 0.1 <math>\mu</math>m</b> | <b>4%</b>   | <b>Krka River estuary</b>                              | <b>This study</b>              |
|             | 10 kDa – 0.2 $\mu$ m                 | < 20%       | San Francisco Bay                                      | (Sañudo-Wilhelmy et al., 1996) |
|             | 5 kDa – 0.2 $\mu$ m                  | 7%          | Gulf of Trieste                                        | (Klun et al., 2019)            |
| Cu          | <b>3 kDa – 0.1 <math>\mu</math>m</b> | <b>32%</b>  | <b>Krka River estuary</b>                              | <b>This study</b>              |
|             | 5 kDa – 0.2 $\mu$ m                  | 20%         | Gulf of Trieste                                        | (Klun et al., 2019)            |
|             | 20 nm – 0.45 $\mu$ m                 | ~30%        | Loire estuary                                          | (Dulaquais et al., 2020)       |
|             | 1 kDa – 0.2 $\mu$ m                  | < 23%       | Xin'an River estuary                                   | (Lu et al., 2020)              |
|             | 1 kDa – 0.2 $\mu$ m                  | < 24%       | Guandang River estuary                                 | (Lu et al., 2020)              |
|             | 1 kDa – 0.2 $\mu$ m                  | < 51%       | Coast of North Yellow Sea                              | (Lu et al., 2019)              |
|             | 10 kDa – 0.2 $\mu$ m                 | < 20%       | San Francisco Bay                                      | (Sañudo-Wilhelmy et al., 1996) |
|             | 5 kDa – 0.2 $\mu$ m                  | 94%         | Penzé estuary                                          | (Waeles et al., 2008)          |
|             | 300 kDa – 0.4 $\mu$ m                | ~70%        | Ob estuary                                             | (Dai and Martin, 1995)         |
| Co          | <b>3 kDa – 0.1 <math>\mu</math>m</b> | <b>18%</b>  | <b>Krka River estuary</b>                              | <b>This study</b>              |
|             | 1 kDa – 0.45 $\mu$ m                 | 19%         | Galveston Bay                                          | (Wen et al., 1999)             |
|             | 0.015 – 0.2 $\mu$ m                  | Up to 86%   | Amazon and Pará River estuaries – low-salinity region  | (de Carvalho et al., 2021)     |
|             | 0.015 – 0.2 $\mu$ m                  | Down to 16% | Amazon and Pará River estuaries – high-salinity region | (de Carvalho et al., 2021)     |
| Zn          | <b>3 kDa – 0.1 <math>\mu</math>m</b> | <b>9%</b>   | <b>Krka River estuary</b>                              | <b>This study</b>              |
|             | 5 kDa – 0.2 $\mu$ m                  | 1%          | Gulf of Trieste                                        | (Klun et al., 2019)            |
|             | 10 kDa – 0.2 $\mu$ m                 | < 3%        | San Francisco Bay                                      | (Sañudo-Wilhelmy et al., 1996) |
|             | 1 kDa – 0.45 $\mu$ m                 | 91%         | Galveston Bay                                          | (Wen et al., 1999)             |
| Cd          | <b>3 kDa – 0.1 <math>\mu</math>m</b> | <b>9%</b>   | <b>Krka River estuary</b>                              | <b>This study</b>              |
|             | 5 kDa – 0.2 $\mu$ m                  | 1%          | Gulf of Trieste                                        | (Klun et al., 2019)            |
|             | 10 kDa – 0.2 $\mu$ m                 | < 1%        | San Francisco Bay                                      | (Sañudo-Wilhelmy et al., 1996) |
|             | 1 kDa – 0.2 $\mu$ m                  | Up to 17%   | Guandang River estuary                                 | (Lu et al., 2020)              |
|             | 1 kDa – 0.2 $\mu$ m                  | Up to 20%   | Xin'an River estuary                                   | (Lu et al., 2020)              |
|             | 100 kDa – 0.4 $\mu$ m                | 34%         | Venice Lagoon                                          | (Martin et al., 1995)          |
|             | > 0.4 nm – 0.45 $\mu$ m              | 37%         | Fal estuary                                            | (Braungardt et al., 2011)      |
|             | 1 kDa – 0.2 $\mu$ m                  | Up to 51%   | Coast of North Yellow Sea                              | (Lu et al., 2019)              |
|             | 1 kDa – 0.45 $\mu$ m                 | 44%         | Galveston Bay                                          | (Wen et al., 1999)             |
| Ni          | <b>3 kDa – 0.1 <math>\mu</math>m</b> | <b>12%</b>  | <b>Krka River estuary</b>                              | <b>This study</b>              |
|             | 5 kDa – 0.2 $\mu$ m                  | 4%          | Gulf of Trieste                                        | (Klun et al., 2019)            |
|             | 10 kDa – 0.2 $\mu$ m                 | < 2%        | San Francisco Bay                                      | (Sañudo-Wilhelmy et al., 1996) |
|             | 1 kDa – 0.45 $\mu$ m                 | 36%         | Galveston Bay                                          | (Wen et al., 1999)             |
|             | 0.015 – 0.2 $\mu$ m                  | Up to 38%   | Amazon and Pará River estuaries – low-salinity region  | (de Carvalho et al., 2021)     |
|             | 0.015 – 0.2 $\mu$ m                  | -           | Amazon and Pará River estuaries – high-salinity region | (de Carvalho et al., 2021)     |

- Benoit, G., Oktay-Marshall, S.D., Cantu, A., Hood, E.M., Coleman, C.H., Corapcioglu, M.O., Santschi, P.H., 1994. Partitioning of Cu, Pb, Ag, Zn, Fe, Al, and Mn between filter-retained particles, colloids, and solution in six Texas estuaries. *Mar. Chem.* 45, 307–336. [https://doi.org/10.1016/0304-4203\(94\)90076-0](https://doi.org/10.1016/0304-4203(94)90076-0)
- Braungardt, C.B., Howell, K.A., Tappin, A.D., Achterberg, E.P., 2011. Temporal variability in dynamic and colloidal metal fractions determined by high resolution in situ measurements in a UK estuary. *Chemosphere* 84, 423–431. <https://doi.org/10.1016/j.chemosphere.2011.03.050>
- Dai, M.-H., Martin, J.-M., 1995. First data on trace metal level and behaviour in two major Arctic river-estuarine systems (Ob and Yenisey) and in the adjacent Kara Sea, Russia. *Earth Planet. Sci. Lett.* 131, 127–141. [https://doi.org/10.1016/0012-821X\(95\)00021-4](https://doi.org/10.1016/0012-821X(95)00021-4)
- de Carvalho, L.M., Hollister, A.P., Trindade, C., Gledhill, M., Koschinsky, A., 2021. Distribution and size fractionation of nickel and cobalt species along the Amazon estuary and mixing plume. *Mar. Chem.* 236, 104019. <https://doi.org/10.1016/j.marchem.2021.104019>
- Dulaquais, G., Waeles, M., Breitenstein, J., Knoery, J., Riso, R., 2020. Links between size fractionation, chemical speciation of dissolved copper and chemical speciation of dissolved organic matter in the Loire estuary. *Environ. Chem.* 17, 385. <https://doi.org/10.1071/EN19137>
- Klun, K., Falnoga, I., Mazej, D., Šket, P., Faganeli, J., 2019. Colloidal Organic Matter and Metal(loid)s in Coastal Waters (Gulf of Trieste, Northern Adriatic Sea). *Aquat. Geochemistry* 25, 179–194. <https://doi.org/10.1007/s10498-019-09359-6>
- Lu, Y., Gao, X., Chen, C.T.A., 2019. Separation and determination of colloidal trace metals in seawater by cross-flow ultrafiltration, liquid-liquid extraction and ICP-MS. *Mar. Chem.* 215, 103685. <https://doi.org/10.1016/j.marchem.2019.103685>
- Lu, Y., Gao, X., Song, J., Chen, C.T.A., Chu, J., 2020. Colloidal toxic trace metals in urban riverine and estuarine waters of Yantai City, southern coast of North Yellow Sea. *Sci. Total Environ.* 717, 135265. <https://doi.org/10.1016/j.scitotenv.2019.135265>
- Martin, J. -M, Dai, M. -H, Cauwet, G., 1995. Significance of colloids in the biogeochemical cycling of organic carbon and trace metals in the Venice Lagoon (Italy). *Limnol. Oceanogr.* 40, 119–131. <https://doi.org/10.4319/lo.1995.40.1.0119>
- Sañudo-Wilhelmy, S.A., Rivera-Duarte, I., Russell Flegal, A., 1996. Distribution of colloidal trace metals in the San Francisco Bay estuary. *Geochim. Cosmochim. Acta* 60, 4933–4944. [https://doi.org/10.1016/S0016-7037\(96\)00284-0](https://doi.org/10.1016/S0016-7037(96)00284-0)
- Waeles, M., Tanguy, V., Lespes, G., Riso, R.D., 2008. Behaviour of colloidal trace metals (Cu, Pb and Cd) in estuarine waters: An approach using frontal ultrafiltration (UF) and stripping chronopotentiometric methods (SCP). *Estuar. Coast. Shelf Sci.* 80, 538–544. <https://doi.org/10.1016/j.ecss.2008.09.010>
- Wen, L.S., Santschi, P., Gill, G., Paternostro, C., 1999. Estuarine trace metal distributions in Galveston Bay: Importance of colloidal forms in the speciation of the dissolved phase. *Mar. Chem.* 63, 185–212. [https://doi.org/10.1016/S0304-4203\(98\)00062-0](https://doi.org/10.1016/S0304-4203(98)00062-0)
